# Supplementary material
Source: PubMed Central journal article supplement (PMC2838970)
Supplement: NIHMS164564-supplement-1.pdf [file NIHMS164564-supplement-1.pdf]

Supplemental Table 1. The primers used for real-time PCR are shown with the reference used to obtain the sequence. Some primers were chosen with software from Primer Express. The average  $C_T$  for the gene for normal dogs is shown. The average calculated level of each gene relative to  $\beta$ -actin was calculated using the formula: Ratio of gene to  $\beta$ -actin =  $2^{(C_T \text{ of } \beta\text{-actin} - C_T \text{ of gene})}$ . The calculated level of that gene relative to  $\beta$ -actin for untreated MPS VII dogs at 6 months is shown. The ratio of the gene in MPS VII to normal dogs is shown.

| Gene [source of sequence] | 5' Primer (5' to 3')        | 3' Primer (5' to 3')       | Normal $C_T$ | Normal % actin | MPS VII % actin | Ratio MPS VII to normal |
|---------------------------|-----------------------------|----------------------------|--------------|----------------|-----------------|-------------------------|
| $\beta$ -actin [1]        | CTCCATCATGAAGT<br>GTGACGTT  | ATCTCCTTCTGCAT<br>CCTGTCAG | 20.5         | 100.00%        | 100.00%         | 1.0                     |
| Collagen 1 $\alpha 2$ [2] | CTATCAATGGTGG<br>TACCCAGTTT | TGTTTTGAGAGGC<br>ATGGTTG   | 18.0         | 288.751%       | 365.181%        | 1.3                     |
| Collagen III [1]          | ATAGAGGCTTTGAT<br>GGACGAA   | CCTCGCTCACCAG<br>GAGC      | 26.0         | 2.071%         | 1.591%          | 0.8                     |
| Elastin [3]               | GCTGCAGCCGCTA<br>AAGCAG     | AGGACACCTCCAA<br>GGCCAG    | 32.3         | .030%          | .040%           | 1.3                     |
| Cathepsin B [2]           | CGGCCTTCACCGT<br>GTACT      | GTGACGTGCTGGT<br>ACACTCC   | 23.4         | 9.164%         | 168.630%        | 18.4                    |
| Cathepsin D [3]           | TCAGAATCCCTCT<br>GCACAAGTTC | GGGCCCCCAACT<br>CTGT       | 27.5         | .579%          | 12.058%         | 20.8                    |
| Cathepsin K [4]           | AGGTGGATG<br>AAATCTCTCGG    | TTCTTGAGTTGGC<br>CCTCC AG  | 29.7         | .132%          | .825%           | 6.3                     |
| Cathepsin L [3]           | CGCCGCAGTTTTT<br>GAAACA     | GCTGAGGCTATTC<br>CCAAGCA   | 25.8         | 1.757%         | 3.405%          | 1.9                     |

| Gene [source of sequence]                      | 5' Primer (5' to 3')          | 3' Primer (5' to 3')         | Normal C <sub>T</sub> | Normal % actin | MPS VII % actin | Ratio MPS VII to normal |
|------------------------------------------------|-------------------------------|------------------------------|-----------------------|----------------|-----------------|-------------------------|
| Cathepsin S [3]                                | AAAGCGAGCTGCC<br>ACATGT       | TTAAGGCATCTTCA<br>CTGCCAAA   | 26.2                  | 1.1%           | 25.289%         | 16.4                    |
| Cathepsin V [3]                                | CTTAACCTGGTGG<br>ACTGCTATCAG  | CTGGAAGGCGTTA<br>TCCATGAG    | 36.7                  | .001%          | .002%           | 1.5                     |
| Cathepsin W [3]                                | CTCGTCCTCACCA<br>CCCAATT      | AGTAGCCCTCCTC<br>ACCCCAT     | 30.6                  | .086%          | .933%           | 10.8                    |
| Cathepsin X [3]<br>(same as Cathepsin L)       | GAGCGCGGCTGGA<br>TGA          | CCTCGACGGCAAG<br>GTTGTA      | 27.8                  | .484%          | .947%           | 1.9                     |
| Cystatin C [3]                                 | TGGCAGCTTTGAG<br>TACTGATATGAG | TTTGCTTACAACAC<br>TGCCAATTTT | 39.5                  | <.001%         | <.001%          | Too low                 |
| Matrix metallo-<br>proteinase 1 (MMP-1)<br>[5] | TTCGGGGAGAAGT<br>GATGTTC      | GCAGTTGAACCAG<br>CTATTAGC    | >40                   | <.001%         | <.001%          | Too low                 |
| MMP-2 [5]                                      | ATGGCAAATACGG<br>CTTCTGC      | TGCAGCTCTCATG<br>CTTGTTG     | 23.6                  | 7.665%         | 35.381%         | 4.6                     |
| MMP-3 [6]                                      | ATGGCATCCAGTC<br>CCTGTAT      | AAAGAACAGGAAC<br>TCTCCCC     | 38.4                  | .001%          | .003%           | 3.5                     |
| MMP-8 [3]                                      | CCATCCTTGCCTG<br>ACGGTAT      | AAACGAGGTCCTT<br>GTCCACATC   | 37.0                  | .001%          | .009%           | 9.8                     |

| Gene [source of sequence]                                                              | 5' Primer (5' to 3')      | 3' Primer (5' to 3')      | Normal C <sub>T</sub> | Normal % actin | MPS VII % actin | Ratio MPS VII to normal |
|----------------------------------------------------------------------------------------|---------------------------|---------------------------|-----------------------|----------------|-----------------|-------------------------|
| MMP-9 [5]                                                                              | CGCTATGGCTACA<br>CTCAAGT  | AAGTGATGTCGTT<br>GTGGTGC  | 33.4                  | .038%          | .065%           | 1.7                     |
| MMP-12 [5]                                                                             | GCTCGGAGGTACC<br>TGGAAAAC | CCCACCAACTCCC<br>ATTTTTG  | 30.2                  | 0.069%         | 10.249%         | 147.6                   |
| MMP-13 [5]                                                                             | CTGAGGAAGACTT<br>CCAGCTT  | TTGGACCACTTGA<br>GAGTTCG  | 39.1                  | 0.0003%        | .012%           | 39.6                    |
| Tissue inhibitor metallo-proteinase 1 (TIMP1) [2]                                      | TGCATCCTGCTGTT<br>GCTG    | AACTTGGCCCTGA<br>TGACG    | 28.2                  | 0.507%         | 0.842%          | 1.7                     |
| TIMP2 [2]                                                                              | ATGGGCTGTGAGT<br>GCAAGAT  | CACTCATCCGGAG<br>ACGAGAT  | 23.2                  | 16.136%        | 60.704%         | 3.8                     |
| A disintegrin and metalloproteinase with a thrombospondin type 1 motif 4 (ADAMTS4) [4] | TACTACTATGTGCT<br>GGAGCC  | AGTGACCACATTG<br>TTGTATCC | 29.9                  | 0.088%         | 0.869%          | 9.8                     |
| ADAMTS5 [4]                                                                            | GGCATCATTGATGT<br>GACAC   | GCATCGTAGGTCT<br>GTCCTG   | 38.5                  | 0.0002%        | 0.0002%         | 1.1                     |
| Osteopontin (OPN) [3]                                                                  | TCCCACTGACATTC<br>CAGCAA  | TCACCTCGGCCAT<br>CATATGA  | 25.3                  | 2.179%         | 87.187%         | 40.0                    |

| Gene [source of sequence] | 5' Primer (5' to 3') | 3' Primer (5' to 3') | Normal C <sub>T</sub> | Normal % actin | MPS VII % actin | Ratio MPS VII to normal |
|---------------------------|----------------------|----------------------|-----------------------|----------------|-----------------|-------------------------|
|---------------------------|----------------------|----------------------|-----------------------|----------------|-----------------|-------------------------|

| Interleukin-6 (IL-6)-like cytokines       |                             |                            |      |        |        |      |
|-------------------------------------------|-----------------------------|----------------------------|------|--------|--------|------|
| IL-6 [1]                                  | GCTCCTGGTGATG<br>GCTACTG    | TGTTTGCAGAGGT<br>GAGTGGT   | 32.9 | 0.011% | .073%  | 6.5  |
| Leukemia inhibitory factor (LIF) [3]      | CCCTTCCTATCACC<br>CCTGTCAA  | GTTGGTTCCTGAT<br>CTGGTTCAT | 32.9 | 0.014% | .036%  | 2.6  |
| IL-11 [3]                                 | TGCACAGCTGAGA<br>GACAAATTTT | GGTGGGAAGAGA<br>GTCCAGGTT  | 31.8 | 0.039% | .044%  | 1.1  |
| Oncostatin M (OSM) [3]                    | GACTGAGCCCACT<br>CCAACCA    | TGCGCTGAAAGGT<br>GTCTAAGG  | 35.3 | 0.006% | .159%  | 28.4 |
| Ciliary neurotrophic factor (CNTF) [3]    | AACACAAAATCCC<br>CCCCAAT    | GAGGCCACCATCT<br>CCAAAGA   | 28.4 | 0.504% | .556%  | 1.1  |
| Cardiotrophin 1 (CTF1) [3]                | GCCAAGATCCATC<br>AGACACACA  | CTCCCTGGTGCTG<br>CACATATT  | 26.7 | 1.659% | 1.554% | 0.9  |
| Cardiotrophin-like cytokine 1 (CLCF1) [3] | TGCGGCTGACCCA<br>GAACTAT    | TGAGGCCGCGCAA<br>GTAG      | 33.2 | 0.029% | 0.008% | 0.4  |
| Receptors for IL6-like cytokines          |                             |                            |      |        |        |      |
| Glycoprotein 130 (GP130) [3]              | TCGGTCCAAGTCT<br>TCTCAAGATC | GGCCGCTCCTCAG<br>AATCTAA   | 24.6 | 5.249% | 1.431% | 1.4  |

| Gene [source of sequence]                       | 5' Primer (5' to 3')      | 3' Primer (5' to 3')        | Normal C <sub>T</sub> | Normal % actin | MPS VII % actin | Ratio MPS VII to normal |
|-------------------------------------------------|---------------------------|-----------------------------|-----------------------|----------------|-----------------|-------------------------|
| Oncostatin M (OSM) receptor [3]                 | TCGACCAGCGTGC<br>TTACCA   | GGGACGTGCCAC<br>ACTGT       | 26.9                  | 1.038%         | 5.578%          | 5.4                     |
| Leukemia inhibitory factor (LIF) receptor [3]   | GCACAGATTGGCC<br>AAACGA   | TTGCAACATTTTCC<br>CCATCA    | 30.1                  | 0.591%         | 0.460%          | 0.8                     |
| Ciliary neurotrophic factor (CNTF) receptor [3] | GGACCCAGCCCTC<br>AAGAAC   | TGGTGGAGAACAG<br>GTGCATGT   | 26.3                  | 1.602%         | 1.012%          | 0.6                     |
| IL-11 Receptor [3]                              | GGCTGCCCCATGC<br>TGTAC    | TCCAAGTGCCAGC<br>ATCCA      | 24.0                  | 9.517%         | 7.189%          | 0.8                     |
| Other cytokines                                 |                           |                             |                       |                |                 |                         |
| Transforming growth factor (TGF ) [1]           | TTGATGTCACTGG<br>AGTCGTGA | GGAAGTGAACCCG<br>TTAATGTCTA | 25.8                  | 2.472%         | 3.912%          | 1.6                     |
| Tumor necrosis factor (TNF ) [1]                | GAAGAGCTCCCAA<br>ATTGCCT  | GCTACAACATGAG<br>CTACTGGC   | 35                    | 0.005%         | 0.058%          | 12.6                    |
| Interferon (IFN- ) [7]                          | TCAACCCCTTCTC<br>GCCACT   | GCTGCCTACTTGG<br>TCCCTGA    | >40                   | <.001%         | <.001%          | Too low                 |
| IL-1 [8]                                        | CCTGAACAACAGT<br>TCTCT    | GAGTTAGACAGCA<br>CCAGG      | >40                   | <.001%         | <.001%          | Too low                 |
| Toll-like receptors                             |                           |                             |                       |                |                 |                         |

| Gene [source of sequence]       | 5' Primer (5' to 3')          | 3' Primer (5' to 3')          | Normal $C_T$ | Normal % actin | MPS VII % actin | Ratio MPS VII to normal |
|---------------------------------|-------------------------------|-------------------------------|--------------|----------------|-----------------|-------------------------|
| TLR4 [9]                        | CTTTTATTCAAAGT<br>CTGGCTGGCTT | GTCAAAGCTTTCC<br>AACTTCCTTTCA | 30.5         | 0.065%         | 0.750%          | 11.6                    |
| TLR5 [10]                       | TGGGCGAGCTCTA<br>TGACTCT      | CTGAACGTCTGGT<br>CCTGGAT      | 27.4         | 0.418%         | 0.208%          | 0.5                     |
| Retroviral vector sequences     |                               |                               |              |                |                 |                         |
| WPRES of retroviral vector [11] | GGCTGTTGGGCAC<br>TGACAAT      | ACGTCCCGCGCAG<br>AATC         | >40          | <.001%         | <.001%          | Too low                 |

1. Aihara Y, Kasuya H, Onda H, Hori T, Takeda J. Quantitative analysis of gene expressions related to inflammation in canine spastic artery after subarachnoid hemorrhage. *Stroke*. 2001 Jan;32(1):212-7.
2. Clements DN, Carter SD, Innes JF, Ollier WE, Day PJ. Analysis of normal and osteoarthritic canine cartilage mRNA expression by quantitative polymerase chain reaction. *Arthritis Res Ther*. 2006;8(6):R158.
3. Primer express software.
4. Pelletier JP, Boileau C, Boily M, Brunet J, Mineau F, Geng C, Reboul P, Laufer S, Lajeunesse D, Martel-Pelletier J. The protective effect of licofelone on experimental osteoarthritis is correlated with the downregulation of gene expression and protein synthesis of several major cartilage catabolic factors: MMP-13, cathepsin K and aggrecanases. *Arthritis Res Ther*. 2005;7(5):R1091-102.
5. Muir P, Danova NA, Argyle DJ, Manley PA, Hao Z. Collagenolytic protease expression in cranial cruciate ligament and stifle synovial fluid in dogs with cranial cruciate ligament rupture. *Vet Surg*. 2005 Sep-Oct;34(5):482-90.
6. Kuroki K, Cook JL, Stoker AM, Turnquist SE, Kreeger JM, Tomlinson JL. Characterizing osteochondrosis in the dog: potential roles for matrix metalloproteinases and mechanical load in pathogenesis and disease progression. *Osteoarthritis Cartilage*. 2005 Mar;13(3):225-34.
7. Peters IR, Helps CR, Calvert EL, Hall EJ, Day MJ. Cytokine mRNA quantification in histologically normal canine duodenal mucosa by real-time RT-PCR. *Vet Immunol Immunopathol*. 2005 Jan 10;103(1-2):101-11.
8. Kiczak L, Paslawska U, Bania J, Ugorski M, Sambor I, Kochman A, Blach J, Chelmonska-Soyta A. Increased expression of interleukin-1beta and its novel splice variant in canine hearts with volume overload. *Cytokine*. 2008 Dec;44(3):352-60, 2008.
9. Burgener IA, König A, Allenspach K, Sauter SN, Boisclair J, Doherr MG, Jungi TW. Upregulation of toll-like receptors in chronic enteropathies in dogs. *J Vet Intern Med*. 2008 May-Jun;22(3):553-60.
10. House AK, Gregory SP, Catchpole B. Pattern-recognition receptor mRNA expression and function in canine monocyte/macrophages and relevance to canine anal furunculosis. *Vet Immunol Immunopathol*. 2008 Aug 15;124(3-4):230-40.

11. L. Xu L, R.L. Mango, M.S. Sands, M.E. Haskins, N.M. Ellinwood, K.P. Ponder. Evaluation of pathological manifestations of disease in mucopolysaccharidosis VII mice after neonatal hepatic gene therapy. *Mol Ther.* 6 (2002) 745-758.
