# Supplementary material
Source: PubMed Central journal article supplement (PMC2838970)

**Supplementary Figure 1. Collagen in the aorta.** Sections of paraffin-embedded aortas that were obtained at 6 months of age from normal dogs, untreated MPS VII dogs, or MPS VII dogs that received neonatal gene therapy were stained with picosirius red, which stains collagen red with regular light. Polarized light results in a red to yellow to green color for collagen, and no color for most other protein. For the low power images, the intima is located at the lower right, and the collagen-rich adventitia is at the upper left. The amount of collagen was quantified by taking photographs at 40X magnification under conditions where the signal was linearly related to the light intensity, and determining the signal for red and green. There were no differences between the groups.

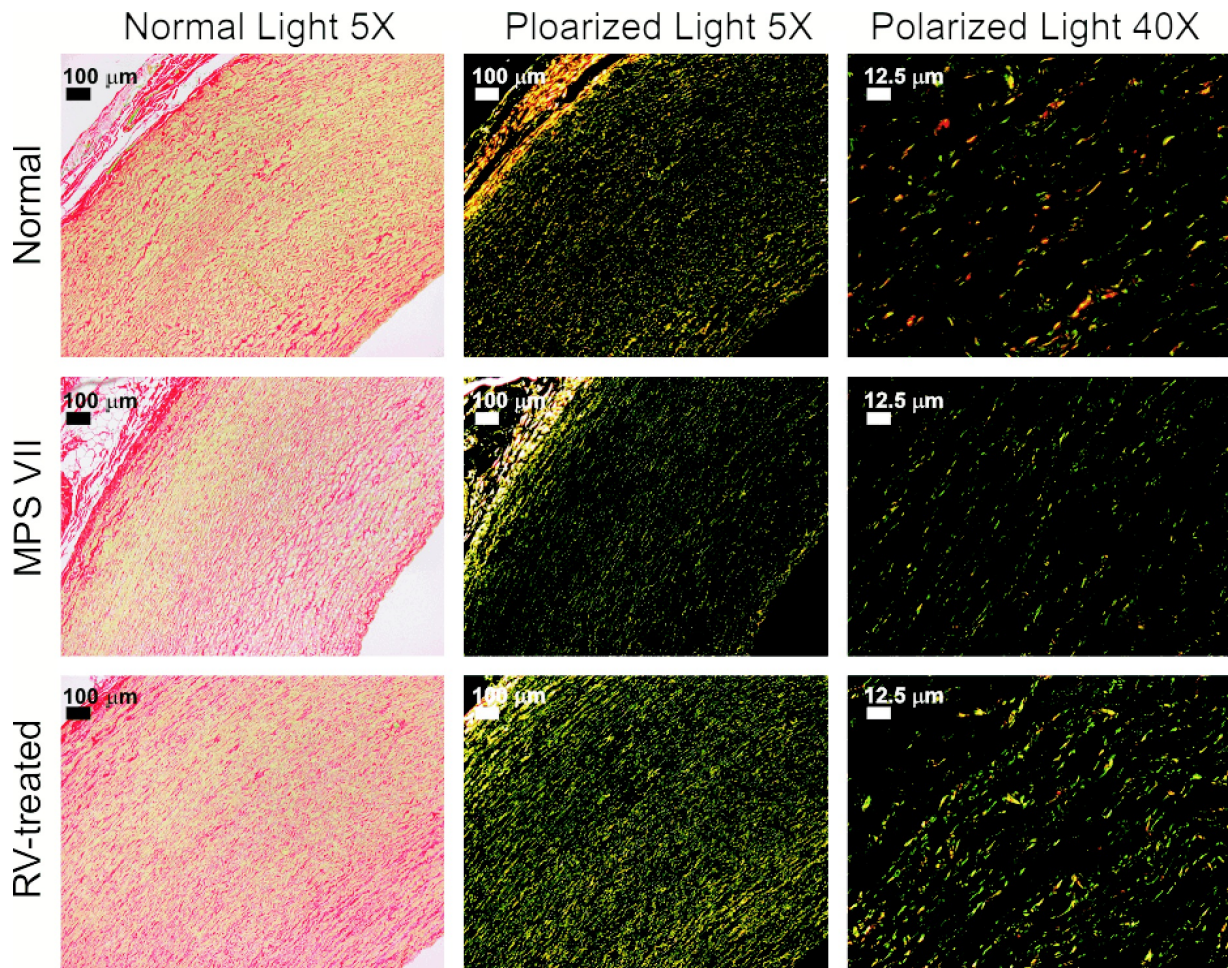

Supplement: NIHMS164564-supplement-2.pdf [file NIHMS164564-supplement-2.pdf]
